# Supplementary material for: Microbiome Alterations Driven by Trypanosoma cruzi Infection in Two Disjunctive Murine Models
Source: PubMed Central journal article supplement (PMC10269900; doi:10.1128/spectrum.00199-23), 2023-05-04

## Supplemental Material

**Figure S1.** Evaluation of the immune profile in response to *Trypanosoma cruzi* infection. (a) Anti-inflammatory and (b) proinflammatory cytokines evaluated. Welch Two Sample t-test was performed. \*  $p < 0.05$ . BALBc infected mice,  $n = 5$ ; BALBc non-infected mice,  $n = 5$ ; c57BL6 infected mice,  $n = 5$ ; c57BL6 non-infected mice,  $n = 5$ .

**Figure S2.** Relative abundance of the 10 most abundant viruses identified in (a) BALBc and (b) c57BL6 mice for each of the measurement points. NI = non-infected; DPI = days post-infection. (c) Beta diversity analysis was performed by non-parametric multidimensional scaling (NMDS) to compare the microbiota composition between controls and infected BALBc (left) and c57BL6 (right) mice. BALBc infected mice,  $n = 5$ ; BALBc non-infected mice,  $n = 5$ ; c57BL6 infected mice,  $n = 5$ ; c57BL6 non-infected mice,  $n = 5$ .

**Figure S3.** Pangenome analysis for (a) *Akkermansia muciniphila* and (b) *Lactobacillus johnsonii*. Complete and good-quality genomes available in PATRIC were downloaded: 96 genomes of *Akkermansia muciniphila* and 15 of *Lactobacillus johnsonii*. Phylogenetic trees were made in ITol (left) where the source of each isolate was defined according to the available information. The bootstrap value is described between 0 and 1. The branch corresponding to the reconstructed MAG for each case is highlighted in red. The heatmap (right) represents the core genome for the different isolates (including the reconstructed MAGs).

**Figure S4.** Pangenome analysis for (a) *Alistipes finegoldii*, (b) *Staphylococcus xylosum*, and (c) *Faecalibaculum rodentium*. Complete and good-quality genomes available in PATRIC were downloaded: 18 of *Alistipes finegoldii*, 20 of *Staphylococcus xylosum*, and 4 of *Faecalibaculum rodentium*. Phylogenetic trees were made in ITol (left) where the source of each isolate was defined according to the available information. The bootstrap value is described between 0 and 1. The branch corresponding to the reconstructed MAG for each case is highlighted in red. The heatmap (right) represents the core genome for the different isolates (including the reconstructed MAGs).

**Figure S5.** Reconstruction of the amino acid synthesis pathway for the genomes of (a) *Bacteroides thetaiotaomicron* and (b) *Staphylococcus xylosum*, obtained by KEGG mapper from the functional analysis by Koafm. This map presents a modular architecture of the biosynthesis pathways of twenty amino acids, which may be viewed as consisting of the core part and its extensions. The core part is the KEGG module for conversion of three-carbon compounds from glyceraldehyde-3P to pyruvate, together with the pathways around serine and glycine. This KEGG module is the most conserved one in the KEGG MODULE database and is found in almost all the completely sequenced genomes. The extensions are the pathways containing the reaction modules RM001, RM033, RM032, and RM002 for the biosynthesis of branched-chain amino acids (left) and basic amino acids (bottom), and the pathways for biosynthesis of histidine and aromatic amino acids (top right). It is interesting to note that the so-called essential amino acids that cannot be synthesized in humans and other organisms generally appear in these extensions. Furthermore, the bottom extension of basic amino acids appears to be most divergent containing multiple pathways for lysine biosynthesis and multiple gene sets for arginine biosynthesis. Enzymes and metabolites

encoded in each genome are shown in green and the red boxes represent the absence of certain enzymes lacking in the *Staphylococcus xylosus* genome.

**Table S1.** CheckM statistics from MAGs were obtained with their corresponding taxonomic assignment made by GTDB-Tk.

**Table S2.** Summary statistics resulting from pangenome analysis. The results obtained by Roary and Panaroo are shown.

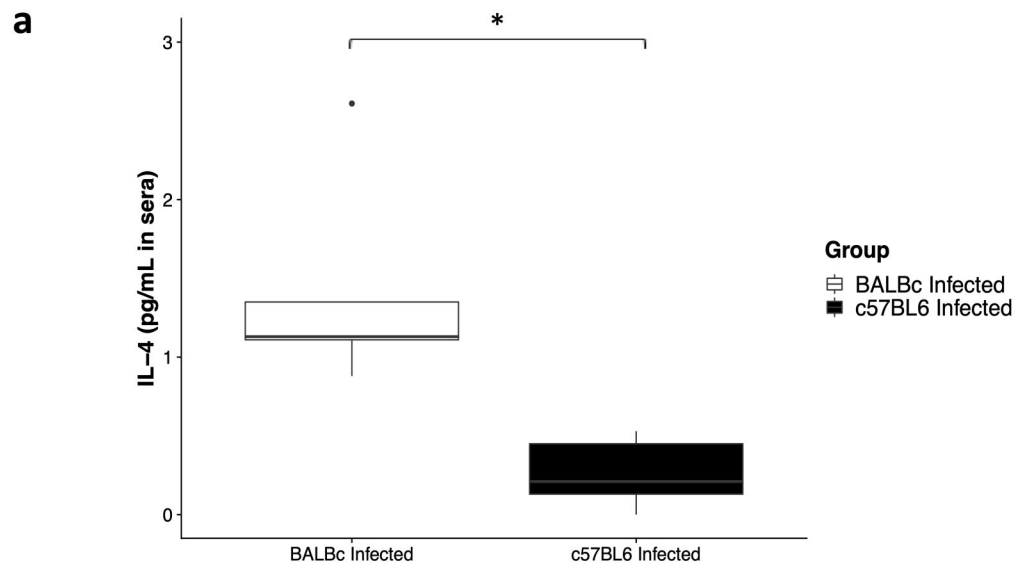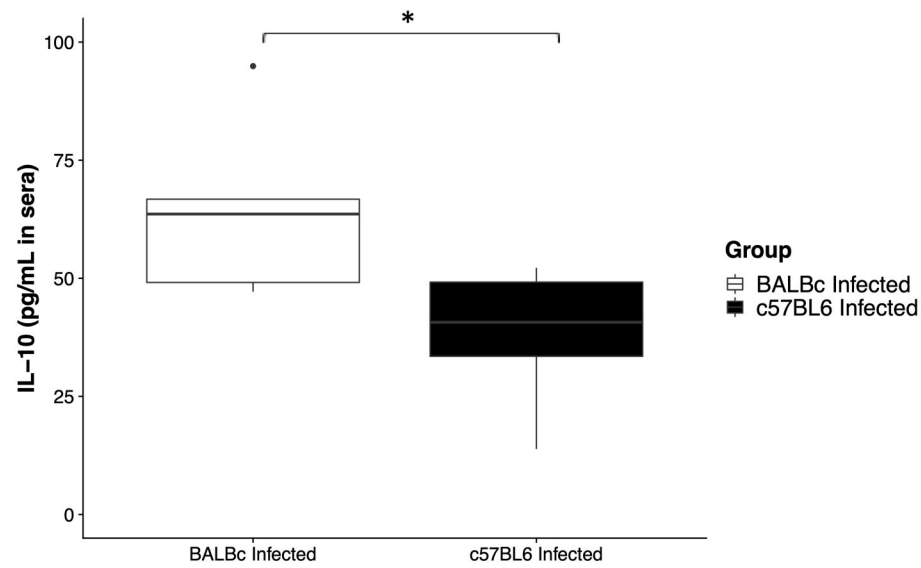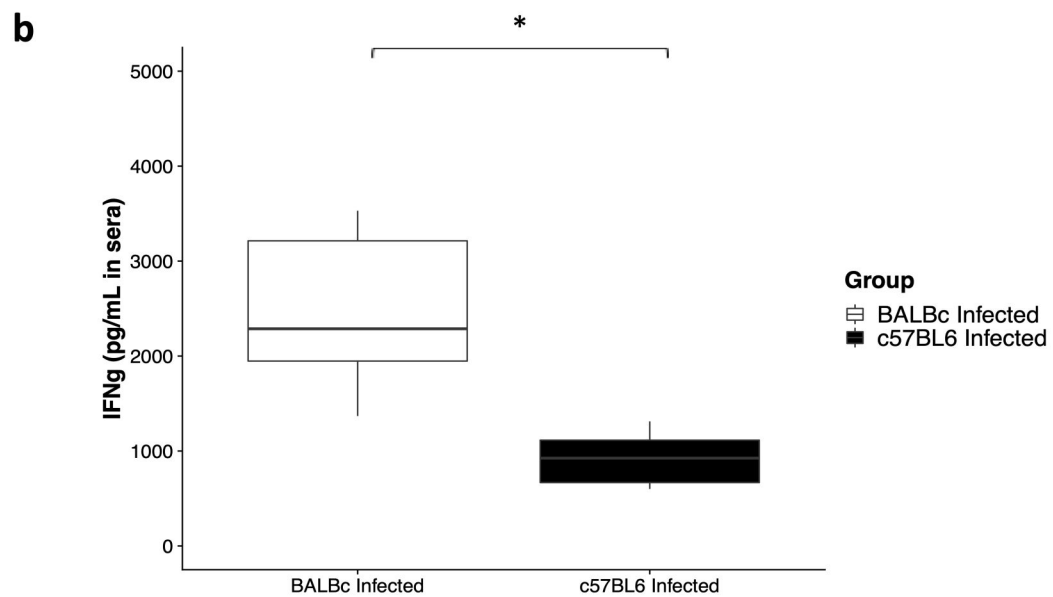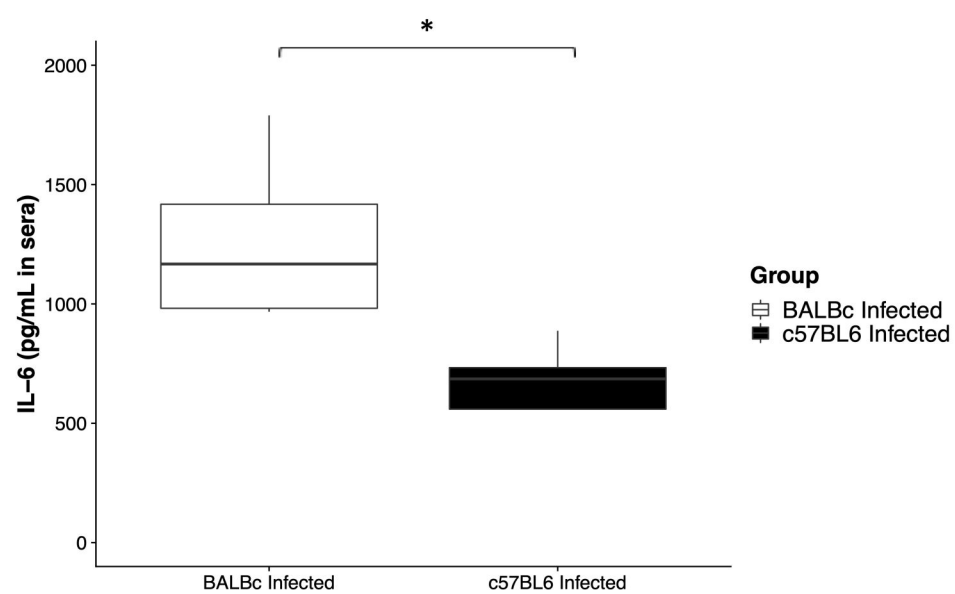

**a**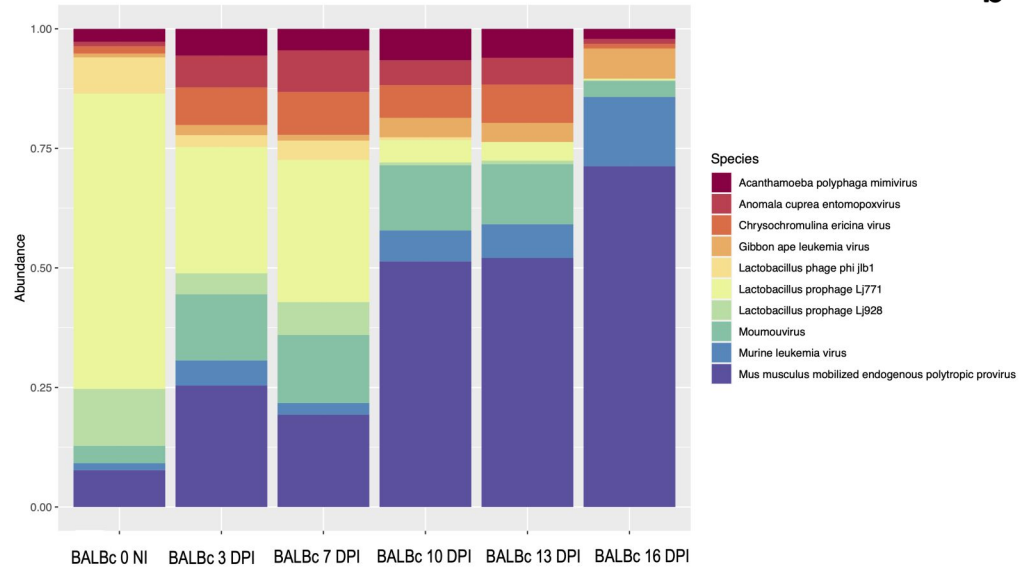**b**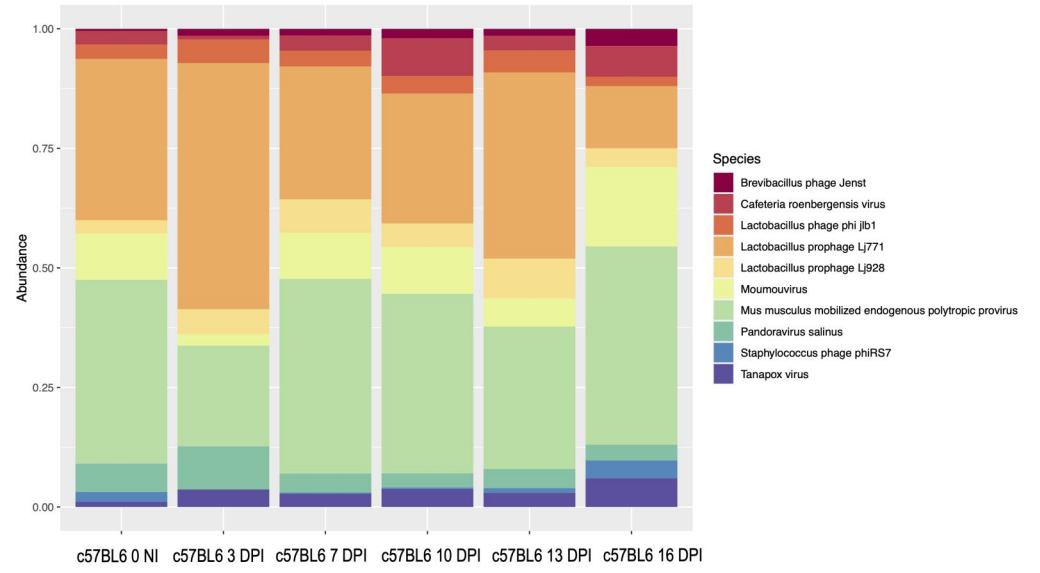**c**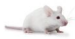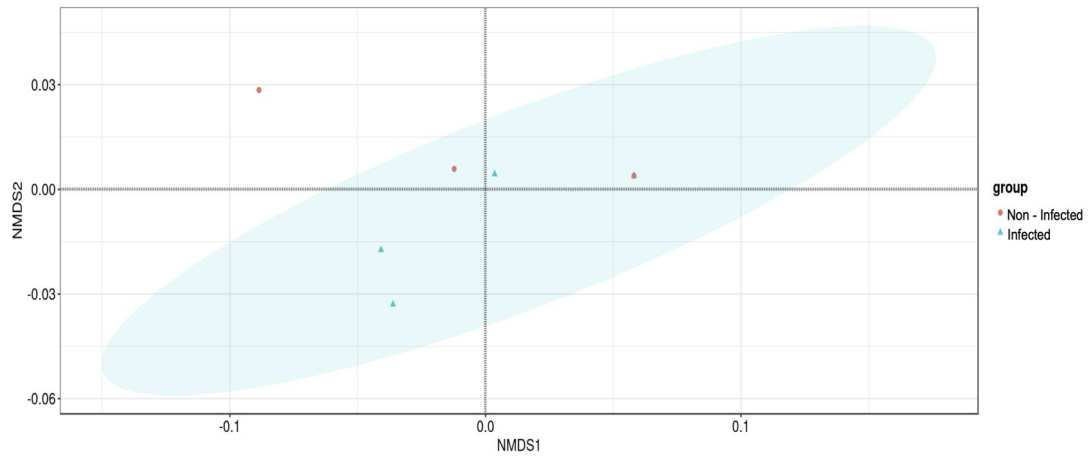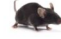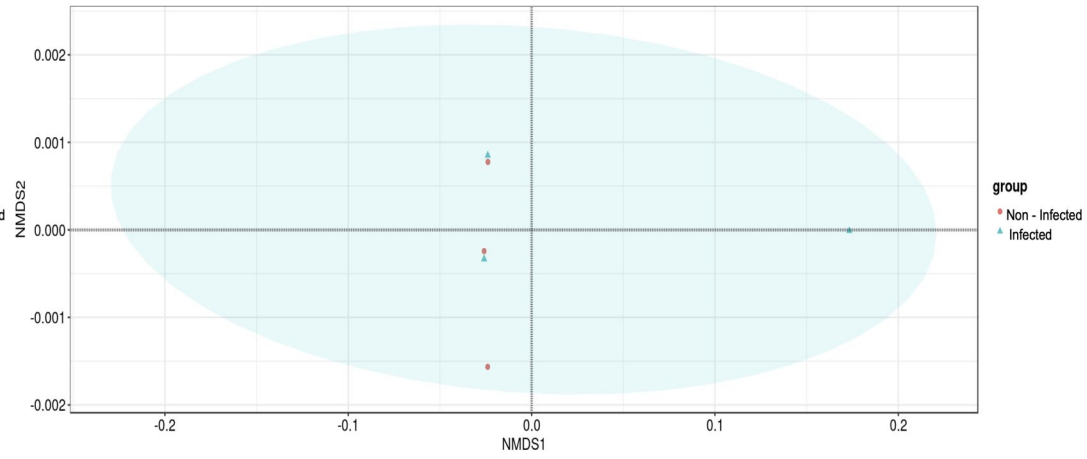

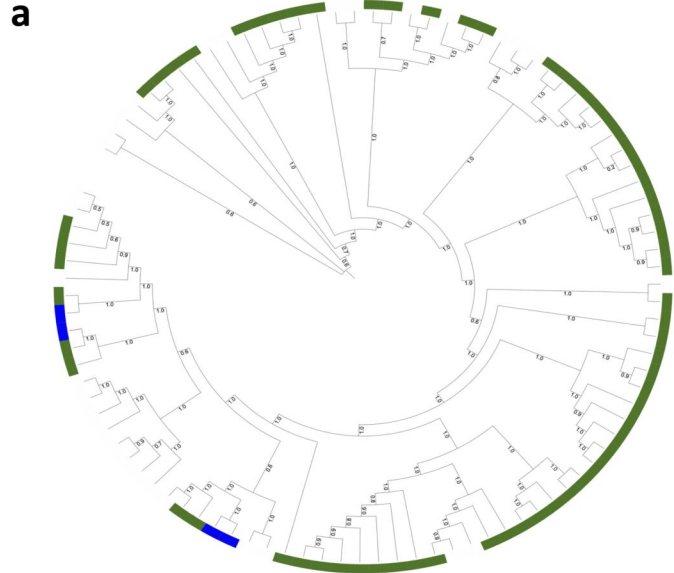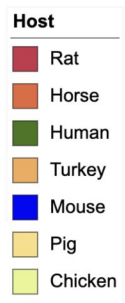

*Akkermansia muciniphila*. n = 97. Core Genome: 9.6%

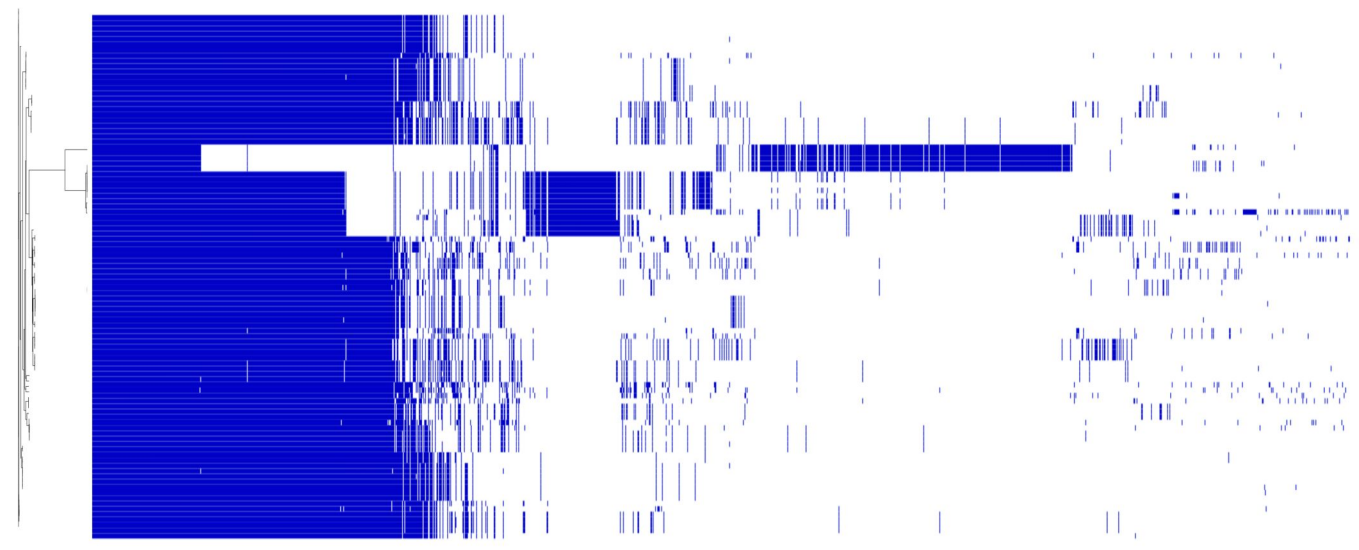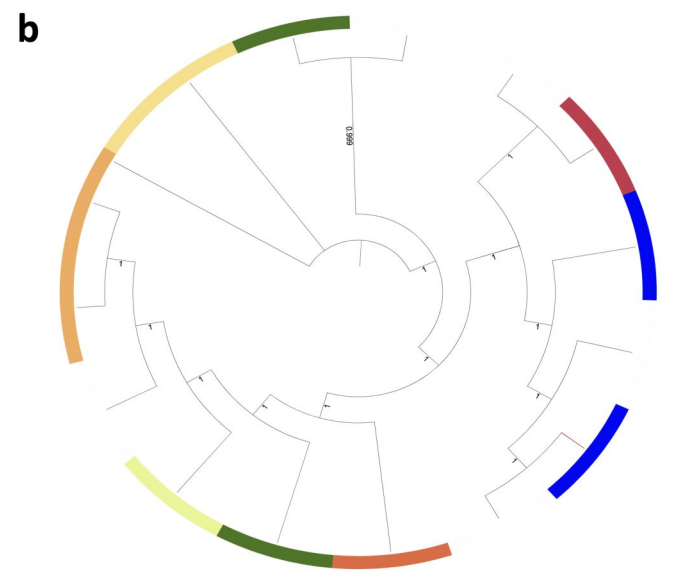

*Lactobacillus johnsonii*. N=16. Core Genome: 33.4%

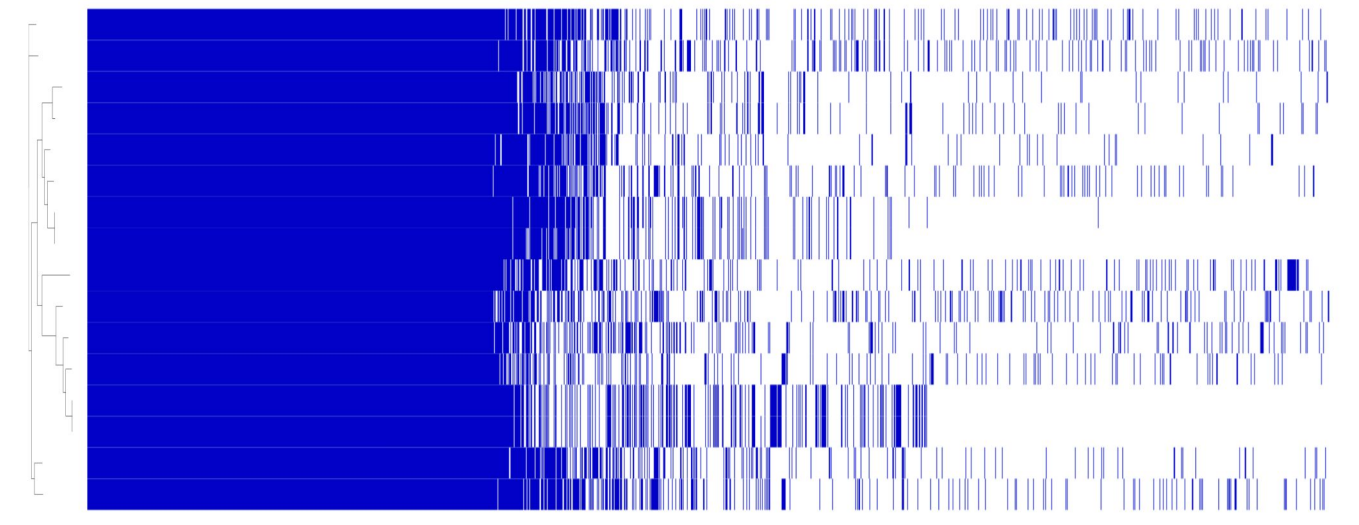

**a**

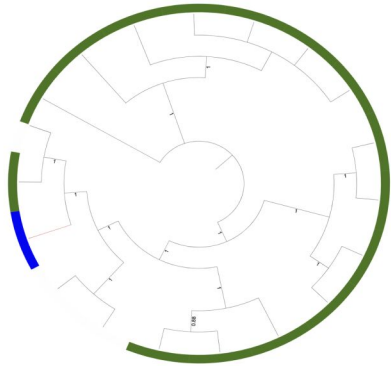

**Host**  
■ Mouse  
■ Human

*Alistipes finegoldii*. n = 19. Core Genome: 11.7%

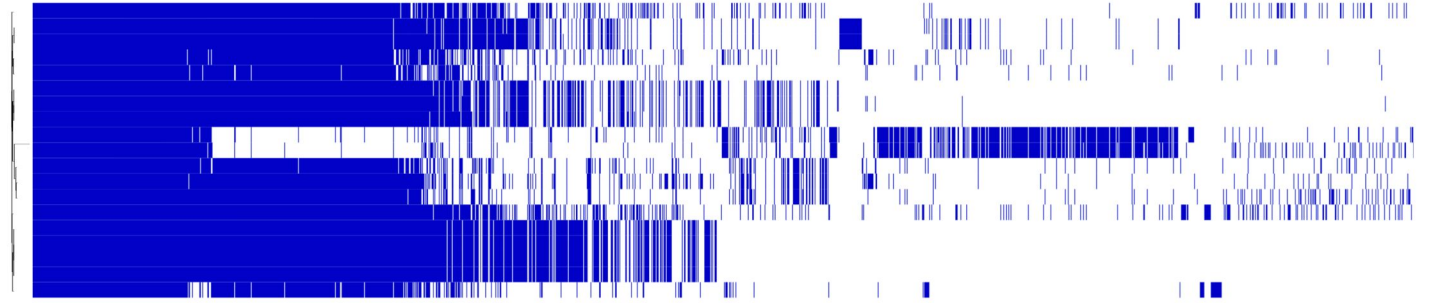

**b**

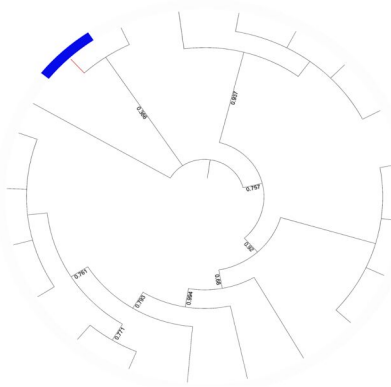

*Staphylococcus xylosus*. n = 21. Core - Soft Core Genome: 42%

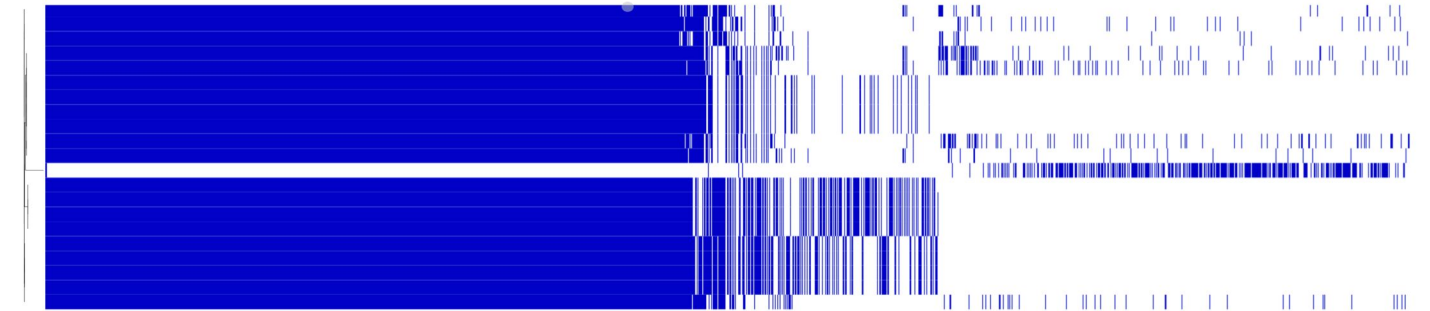

**c**

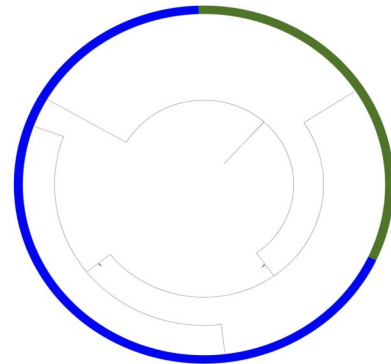

*Faecalibaculum rodentium*. n = 5. Core Genome: 59.2%

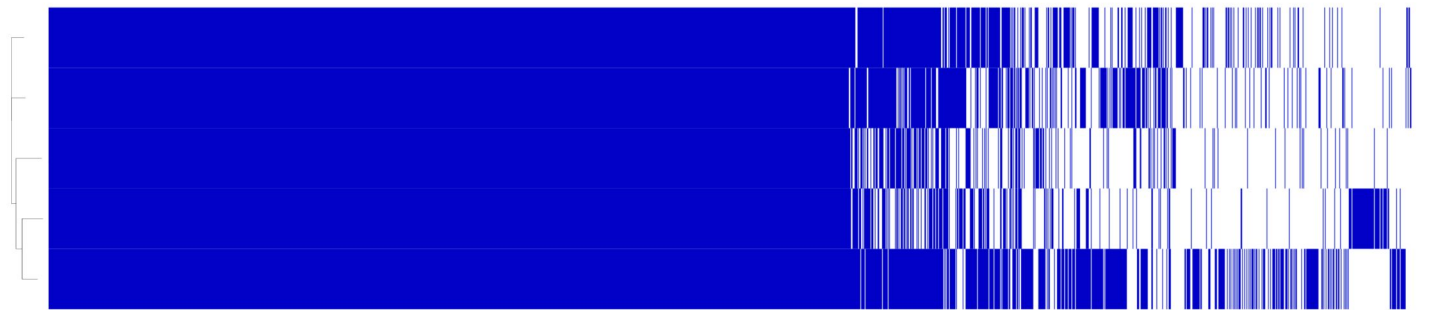

**a**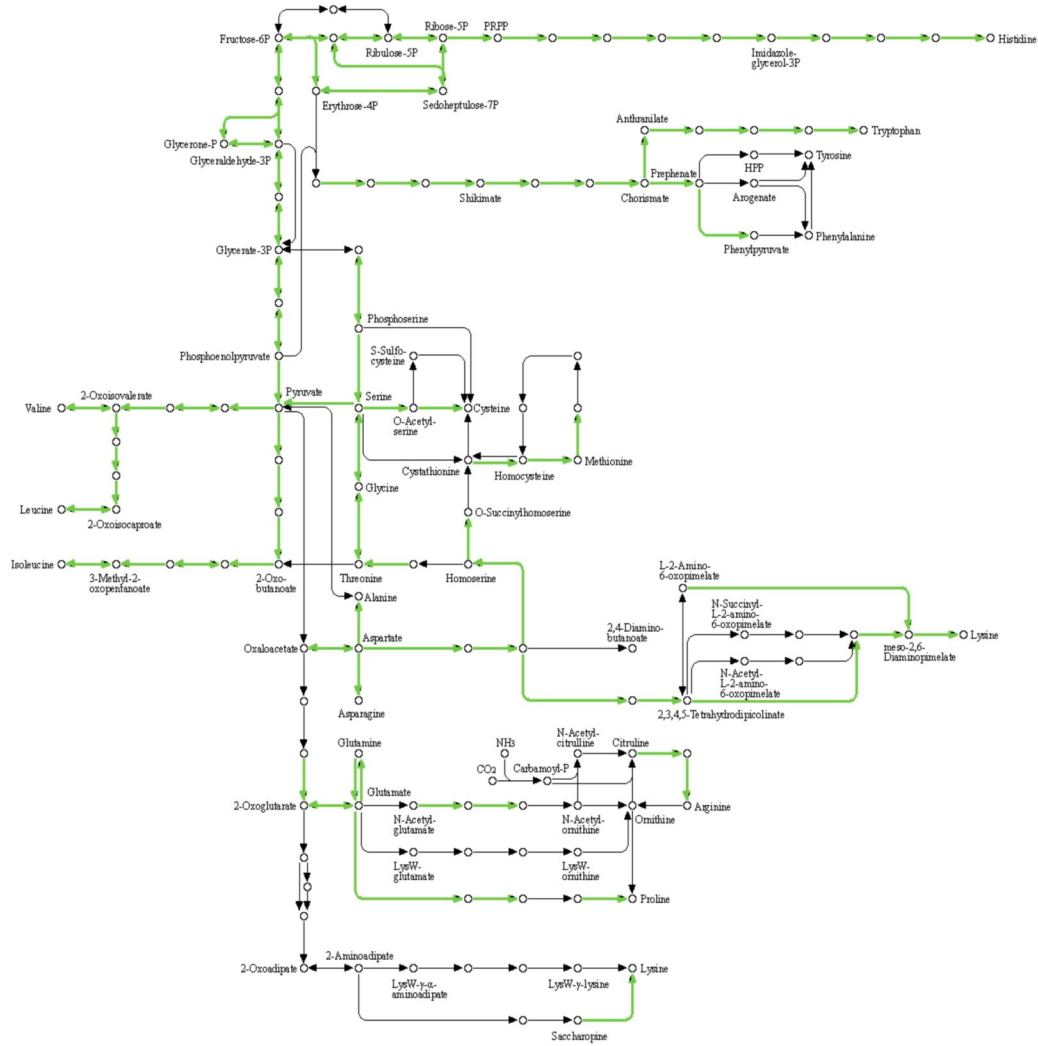**b**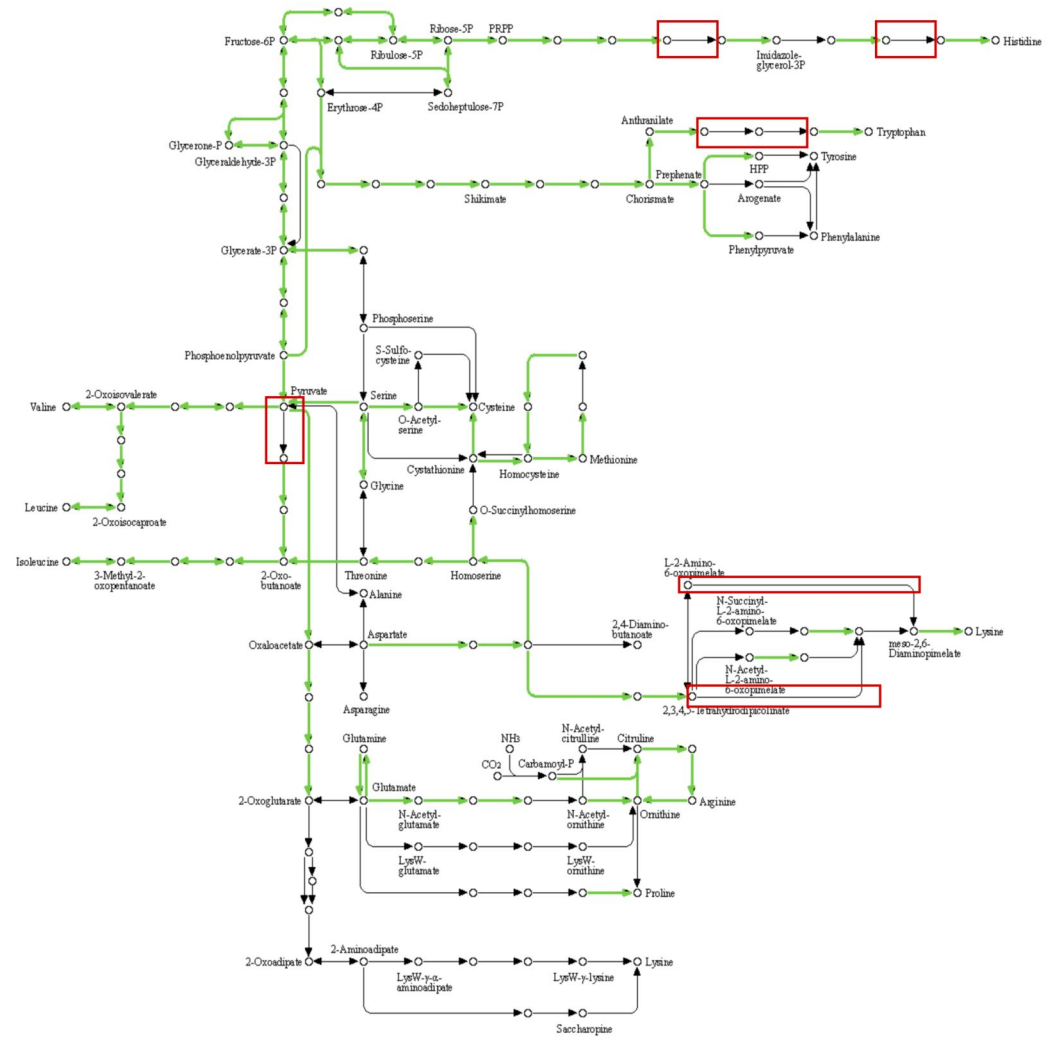

Supplement: spectrum.00199-23-s0001.pdf [file spectrum.00199-23-s0001.pdf]
